# Supplementary material for: Modelling salinity effects on aerobic granular sludge treating fish-canning wastewater
Source: Royal Society of Chemistry journal article supplement (doi:10.1039/d2ew00874b), 2023-01-01
Supplement: d2ew00874b1.pdf [file d2ew00874b1.pdf]

**Supplementary information with**

**MODELLING SALINITY EFFECTS ON AEROBIC GRANULAR SLUDGE  
TREATING FISH-CANNING WASTEWATER**

**P. Carrera<sup>a,b\*</sup>, L. Strubbe<sup>b</sup>, A. Val del Río<sup>a</sup>, A. Mosquera-Corral<sup>a</sup>, E.I.P. Volcke<sup>b</sup>**

<sup>a</sup> CRETUS Institute. Department of Chemical Engineering, Universidade de Santiago de Compostela. E-15782, Santiago de Compostela, Spain

<sup>b</sup> BioCo Research Group, Department of Green Chemistry and Technology, Ghent University, Coupure Links 653, 9000 Gent, Belgium

\*Corresponding author: Paula Carrera (Paula.CarreraFernandez@UGent.be)

## **Appendix A. Supplementary data**

In this appendix, details of the developed one-dimensional biofilm model are given. They include the data used for the calibration and validation of the model (Appendix A.1), the biological conversion reactions, stoichiometric matrix and kinetic and stoichiometric parameters (Appendix A.2). As for salinity inhibition, a literature review of different non-competitive inhibition terms is given in Appendix A.3, also dealing with, the estimating procedure of the inhibition constants used in the model. Some model calibration results are included in Appendix A.4.

### **Appendix A.1: Model input data**

The experimental data used to calibrate and validate the model corresponds to the reactor operation described by Carrera et al. (2019) and is summarized in Table S.1.

Table S.1. Model input data used for the calibration and validation. Experimental data mentioned in the table can be found in Carrera et al. (Carrera et al., 2019).

| Symbol                                    | Definition                                        | Calibration        | Validation         | Units                     | Reference               |
|-------------------------------------------|---------------------------------------------------|--------------------|--------------------|---------------------------|-------------------------|
| <b>Influent characteristics</b>           |                                                   |                    |                    |                           |                         |
| $S_{NH_x, in}$                            | Influent $NH_x$ concentration                     | 73                 | 106                | $g\ N.m^{-3}$             | Exp. data               |
| $S_{S, in}^1$                             | Influent soluble readily biodegradable COD        | 440                | 700                | $g\ COD.m^{-3}$           | Exp. data               |
| $S_{I, in}^1$                             | Influent soluble inert COD                        | 170                | 200                | $g\ COD.m^{-3}$           | Exp. data               |
| $X_{S, in}^1$                             | Influent particulate slowly biodegradable COD     | 83                 | 34                 | $g\ COD.m^{-3}$           | Exp. data               |
| $X_{I, in}^1$                             | Influent particulate inert COD                    | 87                 | 36                 | $g\ COD.m^{-3}$           | Exp. data               |
| <b>Granule characteristics</b>            |                                                   |                    |                    |                           |                         |
| $\epsilon_w$                              | Granule porosity                                  | 0.8                | 0.8                | -                         | De Kreuk et al. (2007)  |
| $R_{SS}$                                  | Surface mean diameter of granules at steady state | 1.25               | 1.1                | mm                        | Exp. data               |
| $\rho^2$                                  | Density of the granules                           | 165                | 140                | $g\ VSS.m^{-3}$           | Exp. data               |
| $\rho_{BM}$                               | Density of biomass                                | $1.13 \times 10^6$ | $9.62 \times 10^5$ | $g\ COD.m^{-3}$           | Calculated (this study) |
| $\rho_{PHA}$                              | Density of PHA                                    | $1 \times 10^9$    | $1 \times 10^9$    | $g\ COD.m^{-3}$           | De Kreuk et al. (2007)  |
| $n_g$                                     | Number of granules                                | 59593              | 89000              | -                         | Calculated (this study) |
| $\epsilon_{PHA}$                          | Initial concentration of PHA                      | 0                  | 0                  | -                         | Calculated (this study) |
| $\epsilon_{OHO}$                          | Initial concentration of OHO                      | 0.19               | 0.19               | -                         | Calculated (this study) |
| $\epsilon_{AOB}$                          | Initial concentration of AOB                      | 0.01               | 0.01               | -                         | Calculated (this study) |
| $\epsilon_{NOB}$                          | Initial concentration of NOB                      | 0                  | 0                  | -                         | Calculated (this study) |
| <b>Reactor and operational conditions</b> |                                                   |                    |                    |                           |                         |
| $V_{reactor}$                             | Total reactor volume                              | 1.7                | 1.7                | L                         | Exp. data               |
| VER                                       | Volume exchange ratio                             | 50                 | 50                 | %                         | Exp. data               |
| $t_{cycle}$                               | Total operation time cycle                        | 4                  | 4                  | h                         | Exp. data               |
| $t_{feeding}$                             | Time of feeding                                   | 5                  | 5                  | min                       | Exp. data               |
| $t_{settling}$                            | Time of settling                                  | 1                  | 1                  | min                       | Exp. data               |
| $t_{discharge}$                           | Time of discharge                                 | 7                  | 7                  | min                       | Exp. data               |
| T                                         | Temperature                                       | 23                 | 23                 | $^{\circ}C$               | Exp. data               |
| $S_{O_2}$                                 | Oxygen concentration                              | 8.6                | 8.6                | $g\ O_2.m^{-3}$           | Exp. data               |
| $VSS_{reactor}$                           | Sludge concentration in the reactor               | 5.9                | 3.6                | $kg\ VSS.m^{-3}$          | Exp. data               |
| $\frac{ISS_{reactor}}{TSS_{reactor}}$     | Ash content of the reactor                        | 0.16               | 0.2                | $\frac{kg\ ISS}{kg\ TSS}$ | Exp. data               |

<sup>1</sup>The COD fractions were measured through fractionation tests following the procedure described by Cristóvão et al. (2016).

<sup>2</sup>The density of the granules was measured following the procedure described by Beun et al. (2002).

The number of granules in the reactor was calculated based on the volatile suspended solids concentration ( $X$ , in g VSS/m<sup>3</sup>) and the density of the granules ( $\rho$ , in g VSS/m<sup>3</sup>), which were both determined experimentally. Granules were assumed to be spherical particles with a uniform radius ( $R_m$ ), which was taken as the average value measured experimentally. The number of granules was calculated as the ratio between the total volume of granules ( $V_X$ , in m<sup>3</sup>) and the volume of a single granule (Eq. 1):

$$n_g = \frac{V_X}{\frac{4}{3}\pi R_m^3} \quad (\text{Eq.1})$$

in which

$$V_X = \frac{V_R X}{\rho} \quad (\text{Eq.2})$$

Where  $V_R$  is the volume of the reactor (m<sup>3</sup>) and  $\rho$  is the density of the granules (g VSS/m<sup>3</sup>), determined experimentally.

The density of the biomass, expressed in terms of COD ( $\rho_{BM}$ ), was calculated following Eq.3.

$$\rho_{BM} = \rho \left( 1 - \frac{ISS_R}{TSS_R} \right) 1.3659 \left( \frac{1}{1 - \epsilon_w} \right) \quad (\text{Eq.3})$$

Where  $\rho$  is the density of the granules (g TSS/m<sup>3</sup>, determined experimentally), ISS are the inert suspended solids and TSS the total suspended solids of the reactor, 1.3659 is the ratio COD/VSS of the biomass (g COD/g VSS, Henze et al. (2008)) and  $\epsilon_w$  is the porosity of the granules, which was estimated as 0.8 (De Kreuk et al., 2007).

## Appendix A.2: model description

In this appendix, a list of the state variables (Table S.2), the stoichiometric matrix (Table S.3), kinetic rate expressions (Table S.4) and stoichiometric and kinetic parameters (Table S.5) are provided.

Table S.2. State variables used in the model

| Symbol      | Definition                           | Units           |
|-------------|--------------------------------------|-----------------|
| $S_{O_2}$   | Dissolved oxygen                     | $g\ O_2.m^{-3}$ |
| $S_I$       | Soluble inert COD                    | $g\ COD.m^{-3}$ |
| $S_S$       | Soluble easily biodegradable COD     | $g\ COD.m^{-3}$ |
| $S_{COD}^1$ | Soluble COD ( $S_I+S_S$ )            | $g\ COD.m^{-3}$ |
| $S_{NH}$    | Ammonium and ammonia                 | $g\ N.m^{-3}$   |
| $S_{NO_2}$  | Nitrite                              | $g\ N.m^{-3}$   |
| $S_{NO_3}$  | Nitrate                              | $g\ N.m^{-3}$   |
| $X_I$       | Particulate inert COD                | $g\ COD.m^{-3}$ |
| $X_S$       | Particulate slowly biodegradable COD | $g\ COD.m^{-3}$ |
| $X_H$       | Heterotrophic organisms              | $g\ COD.m^{-3}$ |
| $X_{STO}$   | Storage compounds                    | $g\ COD.m^{-3}$ |
| $X_A$       | Ammonia oxidizing bacteria           | $g\ COD.m^{-3}$ |
| $X_N$       | Nitrite oxidizing bacteria           | $g\ COD.m^{-3}$ |

<sup>1</sup>This state variable is not shown in the stoichiometric matrix as it was directly calculated as the sum of  $S_I$  and  $S_S$  and it was only used to compare the results of the model with experimental data.

Table S.3. Stoichiometric matrix. The highlighted processes correspond to the modifications applied to ASM3: in **blue** heterotrophic growth based on easily biodegradable COD (added to the model to describe simultaneous growth-storage), in **green** two-step nitrification.

|                               |                                                          | S <sub>O2</sub>           | S <sub>I</sub>  | S <sub>S</sub>      | S <sub>NH</sub>                                                                                         | S <sub>NO2</sub>               | S <sub>NO3</sub>               | X <sub>I</sub> | X <sub>S</sub> | X <sub>H</sub> | X <sub>STO</sub>     | X <sub>A</sub> | X <sub>N</sub> |
|-------------------------------|----------------------------------------------------------|---------------------------|-----------------|---------------------|---------------------------------------------------------------------------------------------------------|--------------------------------|--------------------------------|----------------|----------------|----------------|----------------------|----------------|----------------|
| <b>Heterotrophic Bacteria</b> |                                                          |                           |                 |                     |                                                                                                         |                                |                                |                |                |                |                      |                |                |
| 1                             | Aerobic hydrolysis                                       |                           | f <sub>SI</sub> | 1-f <sub>SI</sub>   | $\frac{-i_{NSS} \cdot (1-f_{SI}) - (f_{SI} \cdot i_{NSI}) + i_{NXS}}{(f_{SI} \cdot i_{NSI}) + i_{NXS}}$ |                                |                                |                | -1             |                |                      |                |                |
| 2                             | Aerobic storage of S <sub>s</sub>                        | -(1/Y <sub>STO</sub> -1)  |                 | -1/Y <sub>STO</sub> |                                                                                                         |                                |                                |                |                |                | 1                    |                |                |
| 3                             | Anoxic storage of S <sub>s</sub> - NO <sub>2</sub>       |                           |                 | -1/Y <sub>STO</sub> |                                                                                                         | -(1/Y <sub>STO</sub> -1)/1.71  |                                |                |                |                | 1                    |                |                |
| 4                             | Anoxic storage of S <sub>s</sub> - NO <sub>3</sub>       |                           |                 | -1/Y <sub>STO</sub> |                                                                                                         |                                | -(1/Y <sub>STO</sub> -1)/2.86  |                |                |                | 1                    |                |                |
| 5                             | Aerobic growth - S <sub>s</sub>                          | -(1/Y <sub>H</sub> -1)    |                 | -1/Y <sub>H</sub>   | -i <sub>NXB</sub>                                                                                       |                                |                                |                |                | 1              |                      |                |                |
| 6                             | Anoxic growth - NO <sub>2</sub>                          |                           |                 | -1/Y <sub>H</sub>   | -i <sub>NXB</sub>                                                                                       | -(1/Y <sub>H</sub> -1)/1.71    |                                |                |                | 1              |                      |                |                |
| 7                             | Anoxic growth - NO <sub>3</sub>                          |                           |                 | -1/Y <sub>H</sub>   | -i <sub>NXB</sub>                                                                                       |                                | -(1/Y <sub>H</sub> -1)/2.86    |                |                | 1              |                      |                |                |
| 8                             | Aerobic growth - X <sub>STO</sub>                        | -(1/Y <sub>HSTO</sub> -1) |                 |                     | -i <sub>NXB</sub>                                                                                       |                                |                                |                |                | 1              | -1/Y <sub>HSTO</sub> |                |                |
| 9                             | Anoxic growth - NO <sub>2</sub>                          |                           |                 |                     | -i <sub>NXB</sub>                                                                                       | -(1/Y <sub>HSTO</sub> -1)/1.71 |                                |                |                | 1              | -1/Y <sub>HSTO</sub> |                |                |
| 10                            | Anoxic growth - NO <sub>3</sub>                          |                           |                 |                     | -i <sub>NXB</sub>                                                                                       |                                | -(1/Y <sub>HSTO</sub> -1)/2.86 |                |                | 1              | -1/Y <sub>HSTO</sub> |                |                |
| 11                            | Aerobic respiration - S <sub>s</sub>                     | -(1-f <sub>x</sub> )      |                 |                     | i <sub>NXB</sub> -i <sub>XI</sub> ·f <sub>x</sub>                                                       |                                |                                | f <sub>x</sub> |                | -1             |                      |                |                |
| 12                            | Anoxic endogenous respiration - NO <sub>2</sub>          |                           |                 |                     | i <sub>NXB</sub> -i <sub>XI</sub> ·f <sub>x</sub>                                                       | -(1-f <sub>x</sub> )/1.71      |                                | f <sub>x</sub> |                | -1             |                      |                |                |
| 13                            | Anoxic endogenous respiration - NO <sub>3</sub>          |                           |                 |                     | i <sub>NXB</sub> -i <sub>XI</sub> ·f <sub>x</sub>                                                       |                                | -(1-f <sub>x</sub> )/2.86      | f <sub>x</sub> |                | -1             |                      |                |                |
| 14                            | Aerobic respiration - X <sub>STO</sub>                   | -1                        |                 |                     |                                                                                                         |                                |                                |                |                |                | -1                   |                |                |
| 15                            | Anoxic respiration of X <sub>STO</sub> - NO <sub>2</sub> |                           |                 |                     |                                                                                                         | -1/1.71                        |                                |                |                |                | -1                   |                |                |
| 16                            | Anoxic respiration of X <sub>STO</sub> - NO <sub>3</sub> |                           |                 |                     |                                                                                                         |                                | -1/2.86                        |                |                |                | -1                   |                |                |

| <b>Ammonia Oxidising Bacteria</b> |                                                 |                   |  |  |                            |                 |                 |       |  |  |  |    |
|-----------------------------------|-------------------------------------------------|-------------------|--|--|----------------------------|-----------------|-----------------|-------|--|--|--|----|
| 17                                | Aerobic growth                                  | $-(3.43-Y_A)/Y_A$ |  |  | $-i_{XB}-1/Y_A$            | $1/Y_A$         |                 |       |  |  |  | 1  |
| 18                                | Aerobic endogenous respiration                  | $-(1-f_X)$        |  |  | $i_{NXB}-i_{XI} \cdot f_X$ |                 |                 | $f_X$ |  |  |  | -1 |
| 19                                | Anoxic endogenous respiration - NO <sub>2</sub> |                   |  |  | $i_{NXB}-i_{XI} \cdot f_X$ | $-(1-f_X)/1.71$ |                 | $f_X$ |  |  |  | -1 |
| 20                                | Anoxic endogenous respiration - NO <sub>3</sub> |                   |  |  | $i_{NXB}-i_{XI} \cdot f_X$ |                 | $-(1-f_X)/2.86$ | $f_X$ |  |  |  | -1 |
| <b>Nitrite Oxidising Bacteria</b> |                                                 |                   |  |  |                            |                 |                 |       |  |  |  |    |
| 21                                | Aerobic growth                                  | $-(1.14-Y_N)/Y_N$ |  |  | $-i_{XB}$                  | $-1/Y_N$        | $1/Y_N$         |       |  |  |  | 1  |
| 22                                | Aerobic endogenous respiration                  | $-(1-f_X)$        |  |  | $i_{NXB}-i_{XI} \cdot f_X$ |                 |                 | $f_X$ |  |  |  | -1 |
| 23                                | Anoxic endogenous respiration - NO <sub>2</sub> |                   |  |  | $i_{NXB}-i_{XI} \cdot f_X$ | $-(1-f_X)/1.71$ |                 | $f_X$ |  |  |  | -1 |
| 24                                | Anoxic endogenous respiration - NO <sub>3</sub> |                   |  |  | $i_{NXB}-i_{XI} \cdot f_X$ |                 | $-(1-f_X)/2.86$ | $f_X$ |  |  |  | -1 |

Table S.4. Kinetic rate expressions for the bioconversion reactions

|                                         |                                                    |                                                                                                                                                                                                                                                                                        |
|-----------------------------------------|----------------------------------------------------|----------------------------------------------------------------------------------------------------------------------------------------------------------------------------------------------------------------------------------------------------------------------------------------|
| 1                                       | Hydrolysis                                         | $k_h \left( \frac{X_S/X_{BH}}{K_X + (X_S/X_{BH})} \right) X_H$                                                                                                                                                                                                                         |
| <b>Heterotrophic bacteria</b>           |                                                    |                                                                                                                                                                                                                                                                                        |
| 2                                       | Aerobic storage of $X_{STO}$                       | $k_{STO} \left( \frac{S_S}{K_{SH} + S_S} \right) \left( \frac{S_O}{K_{OH} + S_O} \right) X_H$                                                                                                                                                                                          |
| 3                                       | Anoxic storage of $X_{STO}$ ( $NO_2$ )             | $k_{STO} \eta_g \left( \frac{K_{OH}}{K_{OH} + S_O} \right) \left( \frac{S_S}{K_{SH} + S_S} \right) \left( \frac{S_{NO_2}}{K_{NO_2H} + S_{NO_2}} \right) X_H$                                                                                                                           |
| 4                                       | Anoxic storage of $X_{STO}$ ( $NO_3$ )             | $k_{STO} \eta_g \left( \frac{K_{OH}}{K_{OH} + S_O} \right) \left( \frac{S_S}{K_{SH} + S_S} \right) \left( \frac{S_{NO_3}}{K_{NO_3H} + S_{NO_3}} \right) X_H$                                                                                                                           |
| 5                                       | Aerobic growth on $S_S$                            | $\mu_H \left( \frac{K_{Inh,H}}{S_{Inh} + K_{Inh,H}} \right) \left( \frac{S_S}{K_{SH} + S_S} \right) \left( \frac{S_O}{K_{OH} + S_O} \right) \left( \frac{S_{NH}}{K_{NHH} + S_{NH}} \right) X_H$                                                                                        |
| 6                                       | Anoxic growth on $S_S$ $NO_2$                      | $\mu_H \eta_g \left( \frac{K_{Inh,H}}{S_{Inh} + K_{Inh,H}} \right) \left( \frac{K_{OH}}{K_{OH} + S_O} \right) \left( \frac{S_S}{K_{SH} + S_S} \right) \left( \frac{S_{NO_2}}{K_{NO_2H} + S_{NO_2}} \right) \left( \frac{S_{NH}}{K_{NHH} + S_{NH}} \right) X_H$                         |
| 7                                       | Anoxic growth on $S_S$ $NO_3$                      | $\mu_H \eta_g \left( \frac{K_{Inh,H}}{S_{Inh} + K_{Inh,H}} \right) \left( \frac{K_{OH}}{K_{OH} + S_O} \right) \left( \frac{S_S}{K_{SH} + S_S} \right) \left( \frac{S_{NO_3}}{K_{NO_3H} + S_{NO_3}} \right) \left( \frac{S_{NH}}{K_{NHH} + S_{NH}} \right) X_H$                         |
| 8                                       | Aerobic growth on $X_{STO}$                        | $\mu_H \left( \frac{K_{Inh,H}}{S_{Inh} + K_{Inh,H}} \right) \left( \frac{S_O}{K_{OH} + S_O} \right) \left( \frac{S_{NH}}{K_{NHH} + S_{NH}} \right) \left( \frac{X_{STO}/X_{BH}}{K_{STO} + (X_{STO}/X_{BH})} \right) X_H$                                                               |
| 9                                       | Anoxic growth on $X_{STO}$ ( $NO_2$ )              | $\mu_H \eta_g \left( \frac{K_{Inh,H}}{S_{Inh} + K_{Inh,H}} \right) \left( \frac{K_{OH}}{K_{OH} + S_O} \right) \left( \frac{S_{NO_2}}{K_{NO_2} + S_{NO_2}} \right) \left( \frac{S_{NH}}{K_{NHH} + S_{NH}} \right) \left( \frac{X_{STO}/X_{BH}}{K_{STO} + (X_{STO}/X_{BH})} \right) X_H$ |
| 10                                      | Anoxic growth on $X_{STO}$ ( $NO_3$ )              | $\mu_H \eta_g \left( \frac{K_{Inh,H}}{S_{Inh} + K_{Inh,H}} \right) \left( \frac{K_{OH}}{K_{OH} + S_O} \right) \left( \frac{S_{NO_3}}{K_{NO_3} + S_{NO_3}} \right) \left( \frac{S_{NH}}{K_{NHH} + S_{NH}} \right) \left( \frac{X_{STO}/X_{BH}}{K_{STO} + (X_{STO}/X_{BH})} \right) X_H$ |
| 11                                      | Aerobic endogenous respiration                     | $b_H \left( \frac{S_O}{K_{OH} + S_O} \right) X_H$                                                                                                                                                                                                                                      |
| 12                                      | Anoxic endogenous respiration ( $NO_2$ )           | $b_H \eta_g \left( \frac{K_{OH}}{K_{OH} + S_O} \right) \left( \frac{S_{NO_2}}{K_{NO_2N} + S_{NO_2}} \right) X_H$                                                                                                                                                                       |
| 13                                      | Anoxic endogenous respiration ( $NO_3$ )           | $b_H \eta_g \left( \frac{K_{OH}}{K_{OH} + S_O} \right) \left( \frac{S_{NO_3}}{K_{NO_3N} + S_{NO_3}} \right) X_H$                                                                                                                                                                       |
| 14                                      | Aerobic endogenous respiration of $X_{STO}$        | $b_{STO} \left( \frac{S_O}{K_{OH} + S_O} \right) X_{STO}$                                                                                                                                                                                                                              |
| 15                                      | Anoxic endogenous respiration $X_{STO}$ ( $NO_2$ ) | $b_{STO} \eta_g \left( \frac{K_{OH}}{K_{OH} + S_O} \right) \left( \frac{S_{NO_2}}{K_{NO_2N} + S_{NO_2}} \right) X_{STO}$                                                                                                                                                               |
| 16                                      | Anoxic endogenous respiration $X_{STO}$ ( $NO_3$ ) | $b_{STO} \eta_g \left( \frac{K_{OH}}{K_{OH} + S_O} \right) \left( \frac{S_{NO_3}}{K_{NO_3N} + S_{NO_3}} \right) X_{STO}$                                                                                                                                                               |
| <b>Ammonia oxidizing bacteria (AOB)</b> |                                                    |                                                                                                                                                                                                                                                                                        |



|                                         |                                                     |                                                                                                                                                               |
|-----------------------------------------|-----------------------------------------------------|---------------------------------------------------------------------------------------------------------------------------------------------------------------|
| 17                                      | Aerobic growth<br>AOB                               | $\mu_A \left( \frac{K_{Inh,A}}{S_{Inh} + K_{Inh,A}} \right) \left( \frac{S_{NH}}{K_{NHA} + S_{NH}} \right) \left( \frac{S_O}{K_{OA} + S_O} \right) X_A$       |
| 18                                      | Aerobic<br>endogenous<br>respiration                | $b_A \left( \frac{S_O}{K_{OA} + S_O} \right) X_A$                                                                                                             |
| 19                                      | Anoxic endogenous<br>respiration (NO <sub>2</sub> ) | $b_A \eta_g \left( \frac{K_{OA}}{K_{OA} + S_O} \right) \left( \frac{S_{NO_2}}{K_{NO_2A} + S_{NO_2}} \right) X_A$                                              |
| 20                                      | Anoxic endogenous<br>respiration (NO <sub>3</sub> ) | $b_A \eta_g \left( \frac{K_{OA}}{K_{OA} + S_O} \right) \left( \frac{S_{NO_3}}{K_{NO_2A} + S_{NO_3}} \right) X_A$                                              |
| <b>Nitrite oxidizing bacteria (NOB)</b> |                                                     |                                                                                                                                                               |
| 21                                      | Aerobic growth<br>NOB                               | $\mu_N \left( \frac{K_{Inh,N}}{S_{Inh} + K_{Inh,N}} \right) \left( \frac{S_{NO_2}}{K_{NO_2N} + S_{NO_2}} \right) \left( \frac{S_O}{K_{ON} + S_O} \right) X_N$ |
| 22                                      | Aerobic<br>endogenous<br>respiration                | $b_N \left( \frac{S_O}{K_{ON} + S_O} \right) X_N$                                                                                                             |
| 23                                      | Anoxic endogenous<br>respiration (NO <sub>2</sub> ) | $b_N \eta_g \left( \frac{K_{ON}}{K_{ON} + S_O} \right) \left( \frac{S_{NO_2}}{K_{NO_2N} + S_{NO_2}} \right) X_N$                                              |
| 24                                      | Anoxic endogenous<br>respiration (NO <sub>3</sub> ) | $b_N \eta_g \left( \frac{K_{ON}}{K_{ON} + S_O} \right) \left( \frac{S_{NO_3}}{K_{NO_3N} + S_{NO_3}} \right) X_N$                                              |

Table S.5. Kinetic and stoichiometric parameters

| <b>Stoichiometric parameters</b> |                                                                           |              |                                                                            |                             |
|----------------------------------|---------------------------------------------------------------------------|--------------|----------------------------------------------------------------------------|-----------------------------|
| <b>Symbol</b>                    | <b>Definition</b>                                                         | <b>Value</b> | <b>Units</b>                                                               | <b>Reference</b>            |
| $Y_A$                            | AOB yield                                                                 | 0.18         | kg COD·kg COD                                                              | Vázquez-Padín et al. (2010) |
| $Y_N$                            | NOB yield                                                                 | 0.08         | kg COD·kg COD                                                              | Vázquez-Padín et al. (2010) |
| $Y_{STO}$                        | Yield for storage substrate                                               | 0.8          | kg COD·kg COD                                                              | Vázquez-Padín et al. (2010) |
| $Y_{HSTO}$                       | Heterotrophic yield from $X_{STO}$                                        | 0.68         | kg COD·kg COD                                                              | Vázquez-Padín et al. (2010) |
| $Y_H$                            | Heterotrophic yield                                                       | 0.57         | kg COD·kg COD                                                              | Vázquez-Padín et al. (2010) |
| $f_{SI}$                         | Production of $S_I$ in hydrolysis                                         | 0            | kg COD·kg COD                                                              | Henze et al. (2000)         |
| $i_{NXB}$                        | Mass of N per mass of COD in biomass                                      | 0.07         | g N·(g COD) <sup>-1</sup>                                                  | Henze et al. (2000)         |
| $i_{NSS}$                        | N content of $S_S$                                                        | 0.03         | g N·(g COD) <sup>-1</sup>                                                  | Henze et al. (2000)         |
| $i_{NSI}$                        | N content of $S_I$                                                        | 0.01         | g N·(g COD) <sup>-1</sup>                                                  | Henze et al. (2000)         |
| $i_{NXI}$                        | N content of $X_I$                                                        | 0.02         | g N·(g COD) <sup>-1</sup>                                                  | Henze et al. (2000)         |
| $i_{NXS}$                        | N content of $X_S$                                                        | 0.04         | g N·(g COD) <sup>-1</sup>                                                  | Henze et al. (2000)         |
| <b>Kinetic parameters</b>        |                                                                           |              |                                                                            |                             |
| <b>Symbol</b>                    | <b>Definition</b>                                                         | <b>Value</b> | <b>Units</b>                                                               | <b>Reference</b>            |
| $\mu_H^*$                        | Maximum specific growth rate for heterotrophs                             | 2.46         | d <sup>-1</sup>                                                            | Henze et al. (2000)         |
| $\mu_A^*$                        | Maximum specific growth rate for AOB                                      | 1.10         | d <sup>-1</sup>                                                            | Wiesmann (1994)             |
| $\mu_N^*$                        | Maximum specific growth rate for NOB                                      | 1.28         | d <sup>-1</sup>                                                            | Wiesmann (1994)             |
| $\mu_H$                          | Maximum specific growth rate for heterotrophs                             | <b>7.76</b>  | d <sup>-1</sup>                                                            | Calibrated - this study     |
| $\mu_A$                          | Maximum specific growth rate for AOB                                      | <b>0.27</b>  | d <sup>-1</sup>                                                            | Calibrated – this study     |
| $\mu_N$                          | Maximum specific growth rate for NOB                                      | <b>0.16</b>  | d <sup>-1</sup>                                                            | Calibrated – this study     |
| $b_H$                            | Decay coefficient for heterotrophs                                        | 0.25         | d <sup>-1</sup>                                                            | Henze et al. (2000)         |
| $b_A$                            | Decay coefficient for AOB                                                 | 0.074        | d <sup>-1</sup>                                                            | Wiesmann (1994)             |
| $b_N$                            | Decay coefficient for NOB                                                 | 0.074        | d <sup>-1</sup>                                                            | Wiesmann (1994)             |
| $b_{STO}$                        | Aerobic respiration rate of $X_{STO}$                                     | 0.25         | d <sup>-1</sup>                                                            | Henze et al. (2000)         |
| $K_{OH}$                         | Oxygen half-saturation coefficient for heterotrophs                       | 0.2          | g O <sub>2</sub> ·m <sup>-3</sup>                                          | Henze et al. (2000)         |
| $K_{OA}$                         | Oxygen half-saturation coefficient for AOB                                | 0.3          | g O <sub>2</sub> ·m <sup>-3</sup>                                          | Wiesmann (1994)             |
| $K_{ON}$                         | Oxygen half-saturation coefficient for NOB                                | 1.1          | g O <sub>2</sub> ·m <sup>-3</sup>                                          | Wiesmann (1994)             |
| $K_S$                            | Org. Mat. Half-saturation coefficient for heterotrophs                    | 2            | g COD·m <sup>-3</sup>                                                      | Henze et al. (2000)         |
| $K_{STO}$                        | $X_{STO}$ half-saturation coefficient for heterotrophs                    | 1            | g COD <sub>STO</sub> ·(g COD <sub>XH</sub> ) <sup>-1</sup>                 | Henze et al. (2000)         |
| $K_{NO2}$                        | NO <sub>2</sub> half-saturation coefficient for denitrifying heterotrophs | 0.5          | g NO <sub>2</sub> -N·m <sup>-3</sup>                                       | Vázquez-Padín et al. (2010) |
| $K_{NO3}$                        | NO <sub>3</sub> half-saturation coefficient for denitrifying heterotrophs | 0.5          | g NO <sub>3</sub> -N·m <sup>-3</sup>                                       | Vázquez-Padín et al. (2010) |
| $K_{NH_A}$                       | Ammonia half-saturation coefficient for AOB                               | 5.71         | g NH <sub>4</sub> -N·m <sup>-3</sup>                                       | Wiesmann (1994)             |
| $K_{NH_{HB}}$                    | Ammonia half-saturation coefficient for heterotrophs                      | 0.05         | g NH <sub>4</sub> -N·m <sup>-3</sup>                                       | Hauduc et al. (2010)        |
| $K_{NO2N}$                       | NO <sub>2</sub> half-saturation coefficient for NOB                       | 0.001        | kg NO <sub>2</sub> -N·m <sup>-3</sup>                                      | Vázquez-Padín et al. (2010) |
| $k_{STO}^*$                      | Storage rate constant                                                     | 6.16         | g COD <sub>Ss</sub> ·(g COD <sub>XH</sub> ) <sup>-1</sup> ·d <sup>-1</sup> | Henze et al. (2000)         |
| $k_{STO}$                        | Storage rate constant                                                     | <b>8</b>     | g COD <sub>Ss</sub> ·(g                                                    | Calibrated – this study     |

|                    |                                                                              |      |                                                                               |                     |
|--------------------|------------------------------------------------------------------------------|------|-------------------------------------------------------------------------------|---------------------|
|                    |                                                                              |      | $\text{COD}_{\text{XH}})^{-1} \cdot \text{d}^{-1}$                            |                     |
| $\eta_g$           | Corrector factor for $\mu_H$ under anoxic conditions                         | 0.6  | -                                                                             | Henze et al. (2000) |
| $k_h$              | Maximum specific hydrolysis rate                                             | 3.69 | $\text{g COD}_{\text{sd}} \cdot (\text{g COD}_{\text{cell}}/\text{day})^{-1}$ | Henze et al. (2000) |
| $K_X$              | Half-saturation coefficient for hydrolysis of slowly biodegradable substrate | 1    | $\text{g COD}_{\text{sd}} \cdot (\text{g COD}_{\text{cell}})^{-1}$            | Henze et al. (2000) |
| $K_{\text{Inh,H}}$ | Salinity inhibition constant for heterotrophs                                | 44.3 | $\text{g NaCl} \cdot \text{m}^{-3}$                                           | This study          |
| $K_{\text{Inh,A}}$ | Salinity inhibition constant for AOB                                         | 24.8 | $\text{g NaCl} \cdot \text{m}^{-3}$                                           | This study          |
| $K_{\text{Inh,N}}$ | Salinity inhibition constant for NOB                                         | 21.7 | $\text{g NaCl} \cdot \text{m}^{-3}$                                           | This study          |

\*Default values used as a first step during the calibration of the model.

The kinetic parameters were corrected taking into account the operation temperature, as suggested by Hauduc et al., (2010), with Eq.4.

$$k(T) = k(20^\circ\text{C}) \cdot \theta_{pow}^{T-20} \quad (\text{Eq.4})$$

Where  $k(T)$  is the kinetic parameter corrected to the working temperature,  $k(20^\circ\text{C})$  is the value of the kinetic parameter at  $20^\circ\text{C}$ ,  $T$  is the temperature ( $^\circ\text{C}$ ) and  $\theta_{pow}$  is calculated from Eq. 5:

$$\theta_{pow} = \left( \frac{k(T_1)}{k(T_2)} \right)^{1/(T_1 - T_2)} \quad (\text{Eq.5})$$

The values of  $k(T_1)$  and  $k(T_2)$  corresponded to the values of the kinetic parameters from ASM3 at 10 and  $20^\circ\text{C}$ .

### Appendix A.3: salinity inhibition

#### Overview

An overview of various non-competitive inhibition models proposed in literature is given in Table S.6.

Table S.6: Non-competitive inhibition models reported in literature.  $K_{Inh,50}$  is the 50% inhibition constant,  $K_{Inh,100}$  is the 100% inhibition constant, and  $S_{Inh}$  is the inhibitor concentration.  $K_{IL}$  (100% inhibition constant),  $m$ ,  $n$  and  $b$  are other model constants.

| Inhibition term                                 | Inhibitor                          | Affected bacteria     | Reference                                   |
|-------------------------------------------------|------------------------------------|-----------------------|---------------------------------------------|
| (1) $\frac{K_{Inh,50}}{K_{Inh,50} + S_{Inh}}$   | Free nitrous acid                  | AOB                   | Jiménez et al. (2012)<br>Torà et al. (2010) |
|                                                 | Fluoride                           | AOB                   | Carrera et al. (2003)                       |
|                                                 | Chloramphenicol                    | Anammox               | Phanwilai et al. (2020)                     |
|                                                 | Cadmium and cooper                 | HB                    | Pai et al. (2009)                           |
|                                                 | Benzene, toluene, phenol, benzoate | Anammox               | Peng et al. (2018)                          |
| (2) $1 - \frac{S_{Inh}}{K_{Inh,100}}$           | Salinity                           | HB<br>Yeast           | Dan et al. (2003)                           |
| (3) $\frac{K_{Inh,50}}{S_{Inh}^m + K_{Inh,50}}$ | Benzene, toluene, phenol, benzoate | Anammox               | Peng et al. (2018)                          |
| (4) $1 - (S_{Inh}/K_{IL})^n$                    | Benzene, toluene, phenol, benzoate | Anammox               | Peng et al. (2018)                          |
|                                                 | Aromatic substances                | Anammox               | Ramos et al. (2015)                         |
| (5) $1 - \frac{1}{1 + (S_{Inh}/K_{Inh,50})^b}$  | Quinoline                          | Anammox               | Chen et al. (2019)                          |
|                                                 | Nanoparticles                      | Anammox               | Song et al. (2018)                          |
|                                                 | Copper                             | Denitrifying bacteria | Chen et al. (2016)                          |

### Estimation of the inhibition constants

The figures corresponding to the reduction of the biological activity associated to the increase of the salt concentrations in biofilms non-adapted to salinity are shown in Figure S.1.

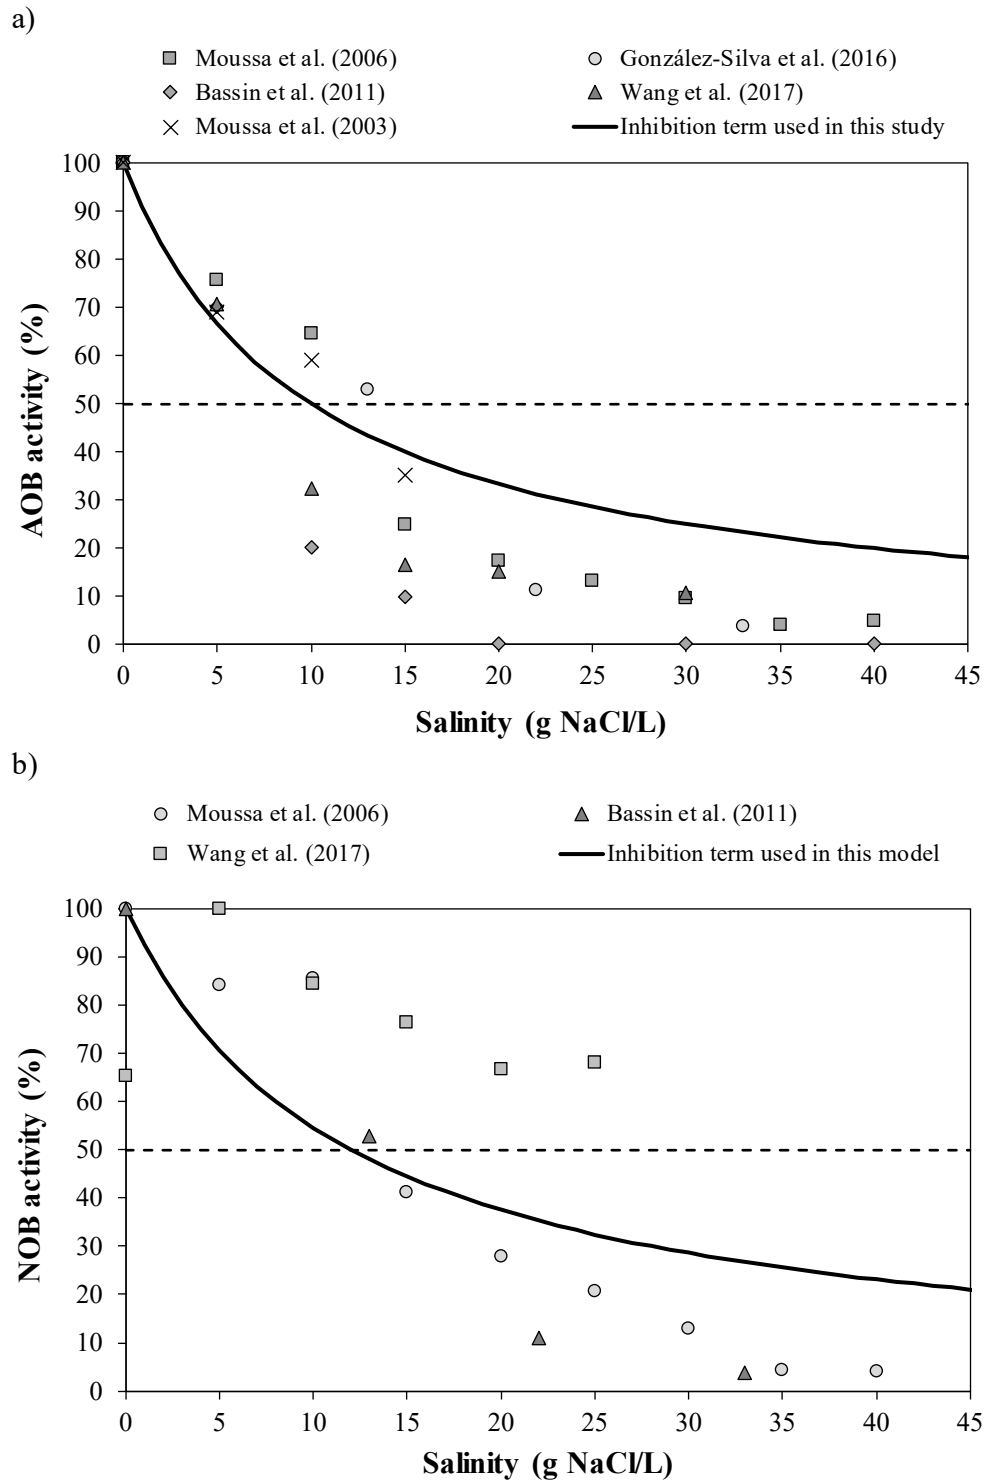

Figure S.1: (a) AOB activity with different salt concentrations of biomass non-adapted to salinity. (b) NOB activity with different salt concentrations of biomass non-adapted to salinity.

## Appendix A.4: model calibration results

### ASM1

Firstly, the results of the ASM1 calibration are shown (Figure S.2). The figure corresponds to the calibration step with a maximum growth rate of heterotrophs of  $20 \text{ d}^{-1}$ . The kinetic parameters of both AOB and NOB were not calibrated.

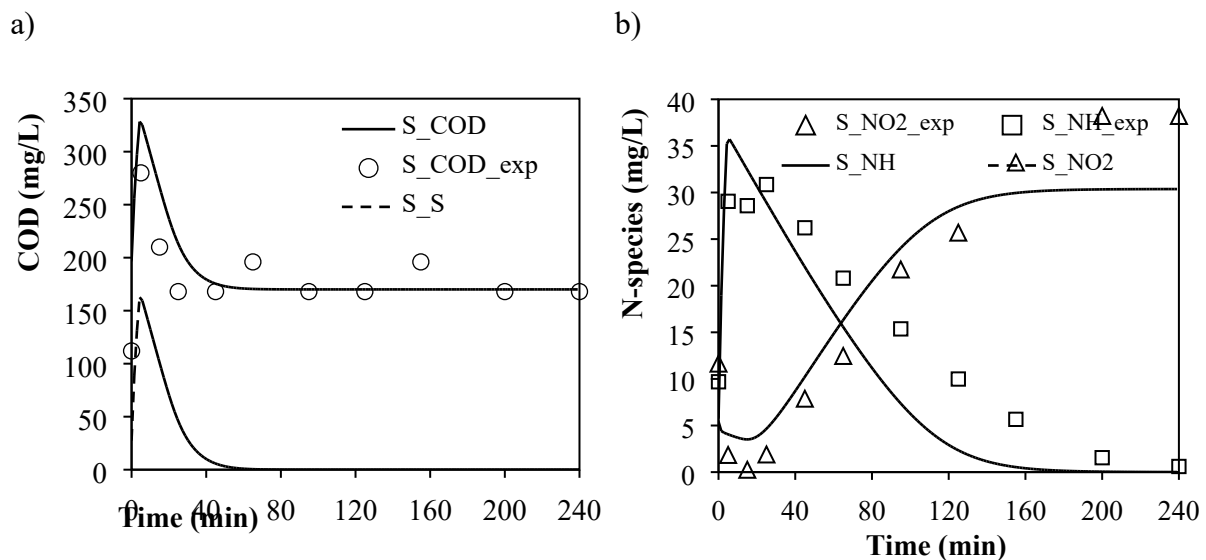

Figure S.2: (a)  $S_{\text{COD}}$  and  $S_{\text{S}}$  profiles predicted with ASM1; and  $S_{\text{COD}}$  profile from experimental data. (b)  $S_{\text{NH}}$  and  $S_{\text{NO}_2}$  profiles predicted with ASM1; and  $S_{\text{NH}}$  and  $S_{\text{NO}_2}$  profiles from experimental data. The experimental data corresponds to a reactor cycle profile measurement performed during the operational phase III.b (salinity of 13 g NaCl/L).

### ASM3

Figure S.3 shows the spatial distribution of each type of bacterial population in the granule. It corresponds to the calibrated ASM3.

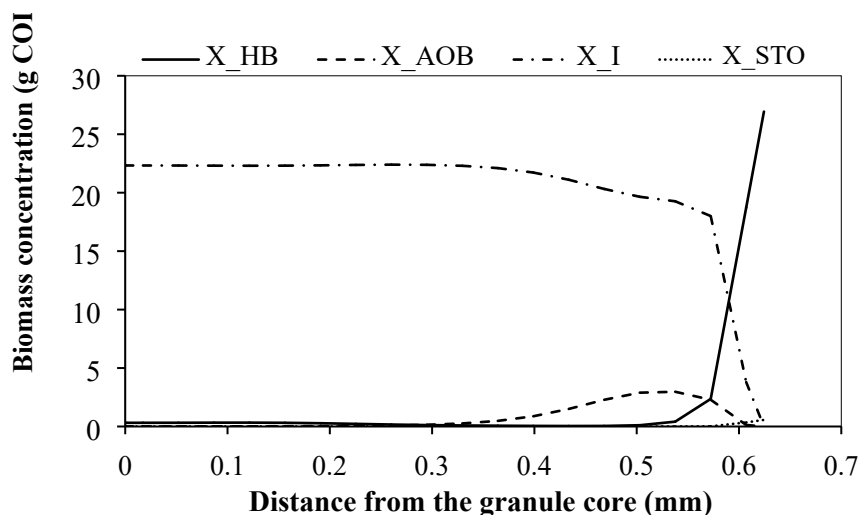

Figure S.3:  $X_H$ ,  $X_A$ ,  $X_{STO}$  and  $X_I$  distribution in the granule predicted by the modified ASM3.

## REFERENCES

- Beun, J.J., Van Loosdrecht, M.C.M., Heijnen, J.J., 2002. Aerobic granulation in a sequencing batch airlift reactor. *Water Res.* [https://doi.org/10.1016/S0043-1354\(01\)00250-0](https://doi.org/10.1016/S0043-1354(01)00250-0)
- Carrera, J., Baeza, J.A., Vicent, T., Lafuente, J., 2003. Biological nitrogen removal of high-strength ammonium industrial wastewater with two-sludge system. *Water Res.* [https://doi.org/10.1016/S0043-1354\(03\)00338-5](https://doi.org/10.1016/S0043-1354(03)00338-5)
- Carrera, P., Campo, R., Méndez, R., Di Bella, G., Campos, J.L., Mosquera-Corral, A., Val del Rio, A., 2019. Does the feeding strategy enhance the aerobic granular sludge stability treating saline effluents? *Chemosphere.* <https://doi.org/10.1016/j.chemosphere.2019.03.127>
- Chen, H., Chen, Q.Q., Jiang, X.Y., Hu, H.Y., Shi, M.L., Jin, R.C., 2016. Insight into the short- and long-term effects of Cu(II) on denitrifying biogranules. *J. Hazard. Mater.* <https://doi.org/10.1016/j.jhazmat.2015.11.012>
- Chen, Q.Q., Xu, L.Z.J., Zhang, Z.Z., Sun, F.Q., Shi, Z.J., Huang, B.C., Fan, N.S., Jin, R.C., 2019. Insight into the short- and long-term effects of quinoline on anammox granules: Inhibition and acclimatization. *Sci. Total Environ.* <https://doi.org/10.1016/j.scitotenv.2018.09.285>
- Cristóvão, R.O., Pinto, V.M.S., Martins, R.J.E., Loureiro, J.M., Boaventura, R.A.R., 2016. Assessing the influence of oil and grease and salt content on fish canning wastewater biodegradation through respirometric tests. *J. Clean. Prod.* 127, 343–351. <https://doi.org/10.1016/j.jclepro.2016.04.057>
- Dan, N.P., Visvanathan, C., Basu, B., 2003. Comparative evaluation of yeast and bacterial treatment of high salinity wastewater based on biokinetic coefficients. *Bioresour. Technol.* [https://doi.org/10.1016/S0960-8524\(02\)00204-3](https://doi.org/10.1016/S0960-8524(02)00204-3)

- De Kreuk, M.K., Picioreanu, C., Hosseini, M., Xavier, J.B., Van Loosdrecht, M.C.M., 2007. Kinetic model of a granular sludge SBR: Influences on nutrient removal. *Biotechnol. Bioeng.* <https://doi.org/10.1002/bit.21196>
- Hauduc, H., Rieger, L., Takács, I., Héduit, A., Vanrolleghem, P.A., Gillot, S., 2010. A systematic approach for model verification: Application on seven published activated sludge models. *Water Sci. Technol.* <https://doi.org/10.2166/wst.2010.898>
- Henze, M., Gujer, W., Mino, T., Loosdrecht, M. van, 2000. Activated Sludge Models ASM1, ASM2, ASM2d and ASM3 IWA Scientific and Technical Report No.9, *Journal of Chemical Information and Modeling.* <https://doi.org/10.1017/CBO9781107415324.004>
- Henze, M., van Loosdrecht, M.C.M., Ekama, G.A., Brdjanovic, D., 2008. *Biological Wastewater Treatment: Principles, Modelling and Design.* <https://doi.org/10.2166/9781780401867>
- Jiménez, E., Giménez, J.B., Seco, A., Ferrer, J., Serralta, J., 2012. Effect of pH, substrate and free nitrous acid concentrations on ammonium oxidation rate. *Bioresour. Technol.* <https://doi.org/10.1016/j.biortech.2012.07.079>
- Pai, T.Y., Wang, S.C., Lo, H.M., Chiang, C.F., Liu, M.H., Chiou, R.J., Chen, W.Y., Hung, P.S., Liao, W.C., Leu, H.G., 2009. Novel modeling concept for evaluating the effects of cadmium and copper on heterotrophic growth and lysis rates in activated sludge process. *J. Hazard. Mater.* <https://doi.org/10.1016/j.jhazmat.2008.11.009>
- Peng, S., Han, X., Song, F., Zhang, L., Wei, C., Lu, P., Zhang, D., 2018. Inhibition of benzene, toluene, phenol and benzoate in single and combination on Anammox activity: implication to the denitrification–Anammox synergy. *Biodegradation.* <https://doi.org/10.1007/s10532-018-9853-x>
- Phanwilai, S., Piyavorasakul, S., Noophan, P. (Lek), Daniels, K.D., Snyder, S.A., 2020. Inhibition of anaerobic ammonium oxidation (anammox) bacteria by addition of high and low concentrations of chloramphenicol and comparison of attached- and suspended-growth. *Chemosphere.* <https://doi.org/10.1016/j.chemosphere.2019.124570>
- Ramos, C., Fernández, I., Suárez-Ojeda, M.E., Carrera, J., 2015. Inhibition of the anammox activity by aromatic compounds. *Chem. Eng. J.* <https://doi.org/10.1016/j.cej.2015.05.071>
- Song, Y.X., Chai, L.Y., Tang, C.J., Xiao, R., Li, B.R., Wu, D., Min, X.B., 2018. Influence of ZnO nanoparticles on anammox granules: The inhibition kinetics and mechanism analysis by batch assays. *Biochem. Eng. J.* <https://doi.org/10.1016/j.bej.2018.02.006>
- Torà, J.A., Lafuente, J., Baeza, J.A., Carrera, J., 2010. Combined effect of inorganic carbon limitation and inhibition by free ammonia and free nitrous acid on ammonia oxidizing bacteria. *Bioresour.*



Technol. <https://doi.org/10.1016/j.biortech.2010.03.005>

Vázquez-Padín, J.R., Mosquera-Corral, A., Campos, J.L., Méndez, R., Carrera, J., Pérez, J., 2010. Modelling aerobic granular SBR at variable COD/N ratios including accurate description of total solids concentration. *Biochem. Eng. J.* <https://doi.org/10.1016/j.bej.2009.12.009>

Wiesmann, U., 1994. Biological nitrogen removal from wastewater. *Adv. Biochem. Eng. Biotechnol.* <https://doi.org/10.1007/bfb0008736>
